# Supplementary material for: Corrigendum: Plasma Markers of Disrupted Gut Permeability in Severe COVID-19 Patients
Source: PubMed Central journal article supplement (PMC8522493; doi:10.3389/fimmu.2021.779064), 2021-10-04

Supplementary Figure 1

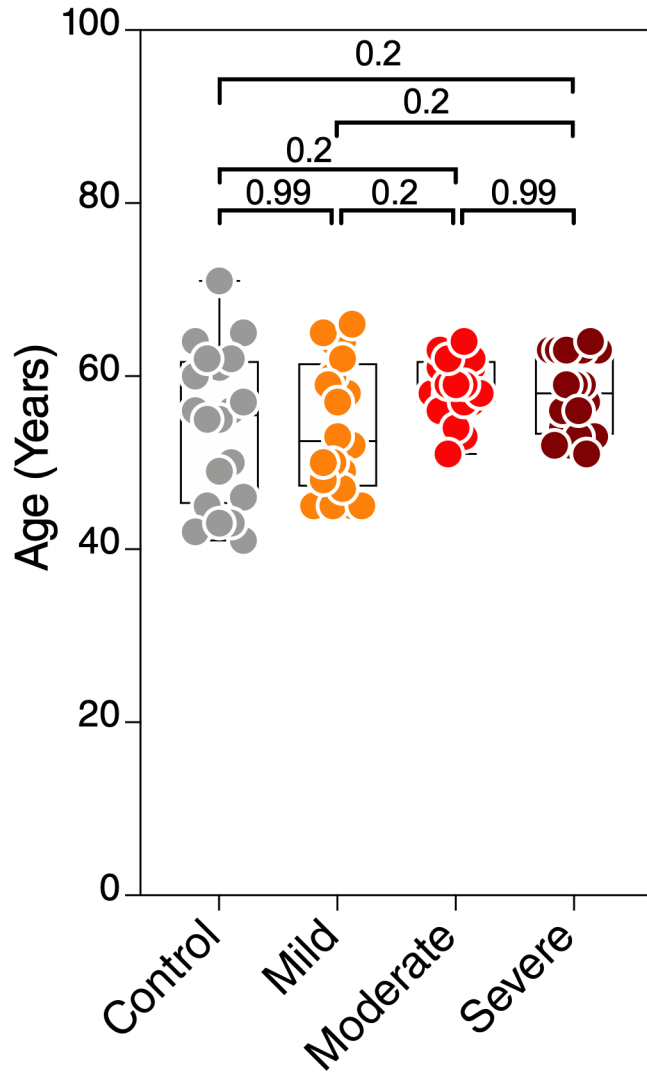

## Supplementary Figure 2

### Top 25 metabolites induced by severe COVID-19

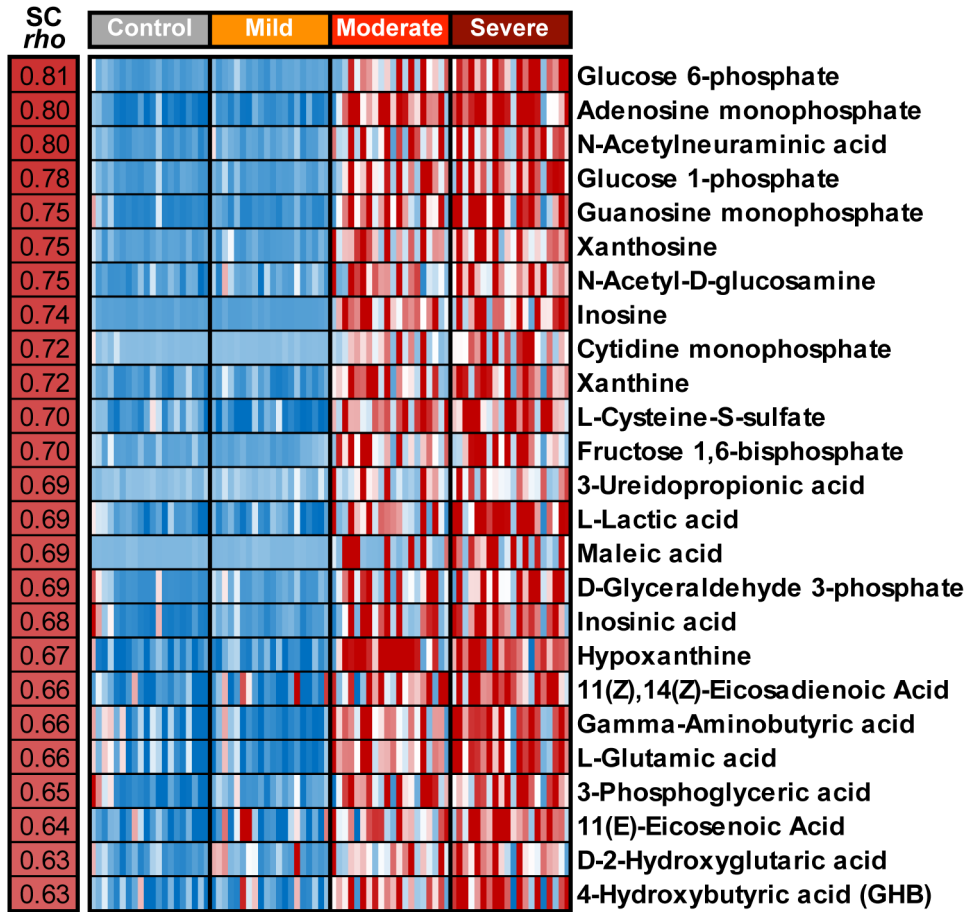

### Top 25 metabolites reduced by severe COVID-19

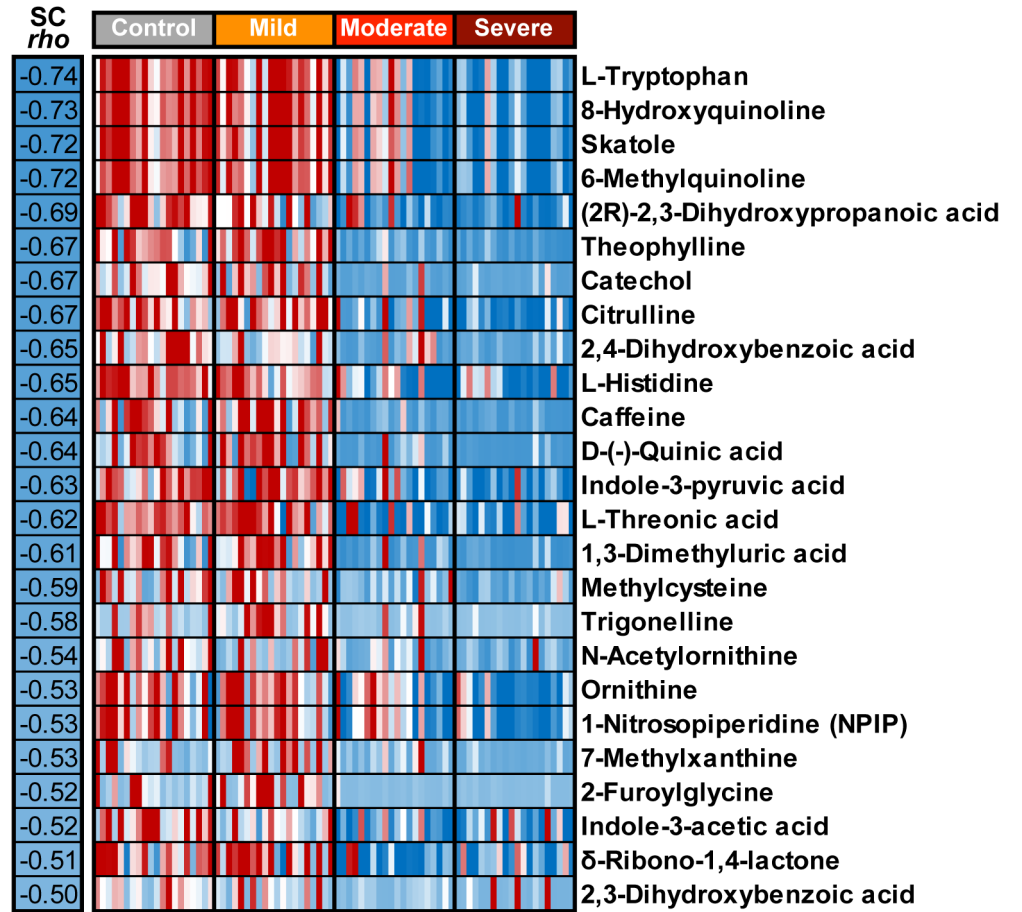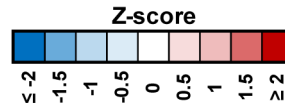

# Supplementary Figure 3

**a**

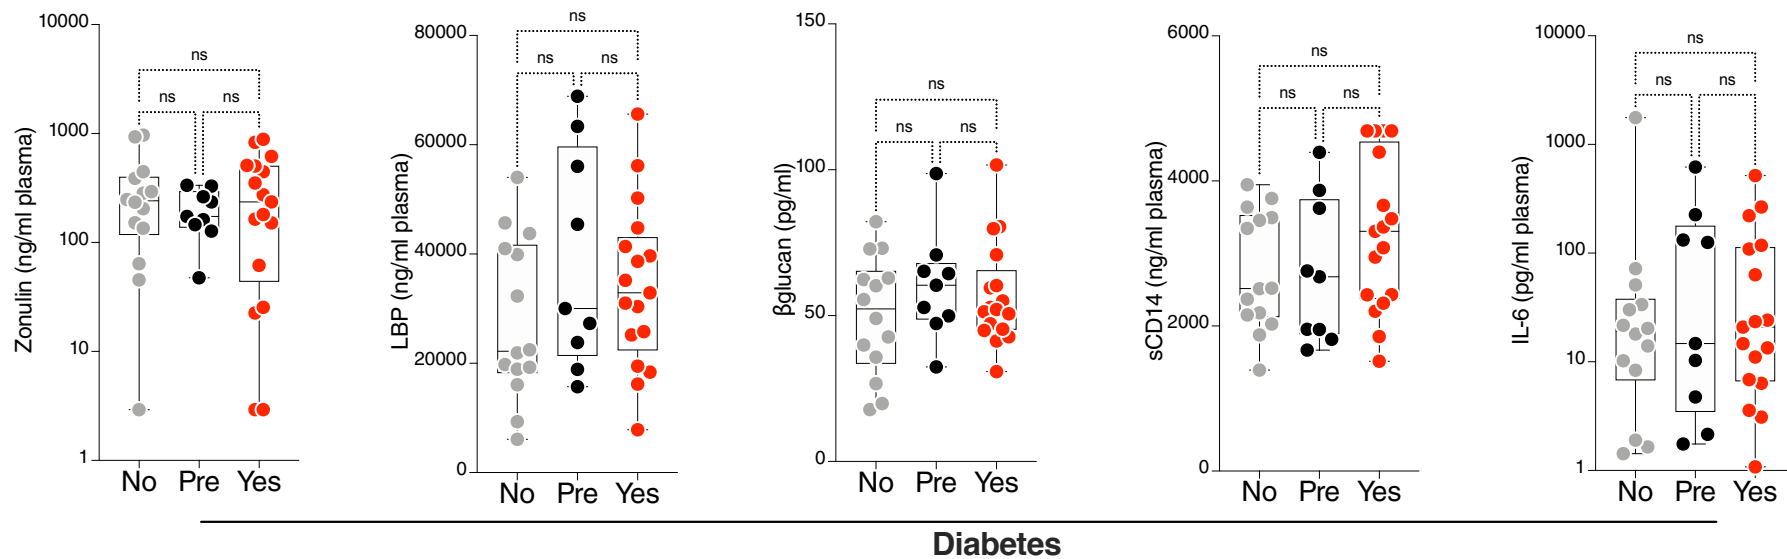

**b**

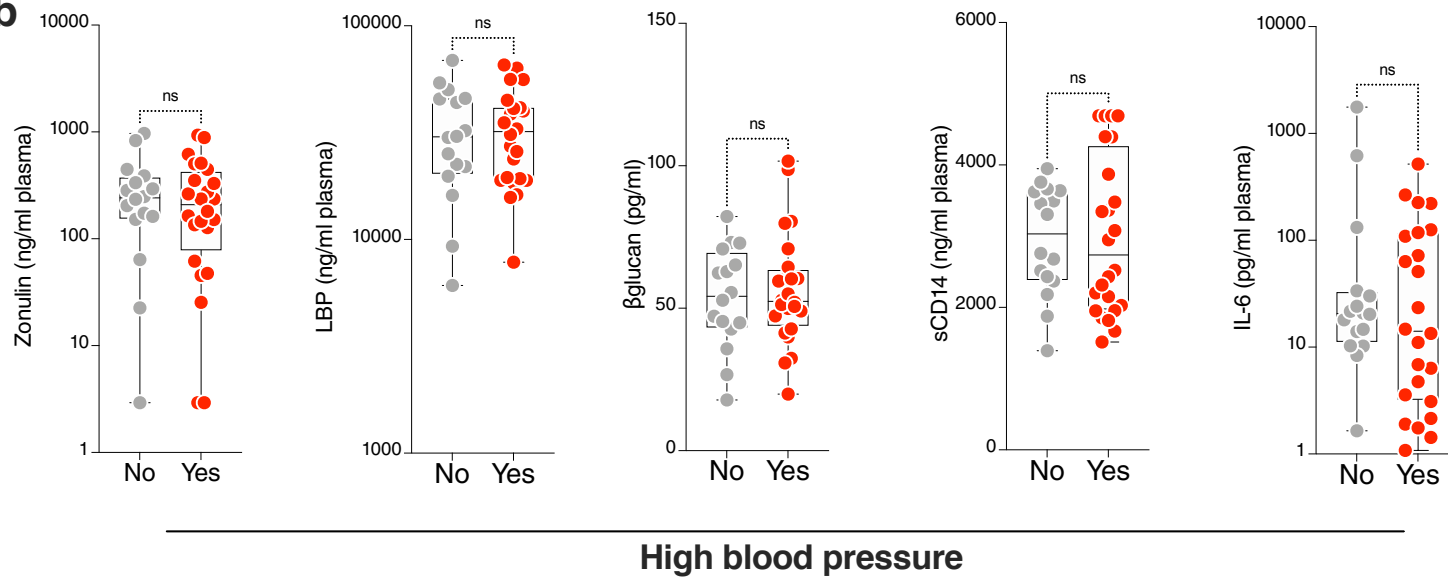

Supplement: DataSheet_1.pdf [file DataSheet_1.pdf]
