# Supplementary material for: Corrigendum: Plasma Markers of Disrupted Gut Permeability in Severe COVID-19 Patients
Source: PubMed Central journal article supplement (PMC8522493; doi:10.3389/fimmu.2021.779064), 2021-10-04
Supplement: DataSheet_2.pdf [file DataSheet_2.pdf]

**Supplementary Table 1.** Demographic and clinical characteristics of the main study cohort.

|                                  | SARS-CoV-2 Negative | SARS-CoV-2 Positive<br>Mild (outpatients) | SARS-CoV-2 Positive<br>Moderate (Inpatients) | SARS-CoV-2 Positive<br>Severe (ICU) |
|----------------------------------|---------------------|-------------------------------------------|----------------------------------------------|-------------------------------------|
| Number ( <i>n</i> )              | 20                  | 20                                        | 20                                           | 20                                  |
| Female, <i>n</i> (%)             | 10 (50)             | 12 (60)                                   | 11 (55)                                      | 7 (35)                              |
| Age, years, median (IQR)         | 55.5 (15.6)         | 52.5 (12.75)                              | 58.5 (4.25)                                  | 58 (9.25)                           |
| Deceased, <i>n</i> (%)           | 0 (0)               | 0 (0)                                     | 2 (10)                                       | 6 (30)                              |
| Body mass index (BMI)            |                     |                                           |                                              |                                     |
| Normal Weight (<25), %           | -                   | 6.7*                                      | 25                                           | 5                                   |
| Overweight/obese (>25), %        | -                   | 93.3*                                     | 75                                           | 95                                  |
| Pre-diabetes, %                  | -                   | 6.7*                                      | 15                                           | 30                                  |
| Diabetes Mellitus (DM), %        | -                   | 6.7*                                      | 30                                           | 55                                  |
| High blood pressure, %           | -                   | 33.3*                                     | 60                                           | 60                                  |
| Asthma, %                        | -                   | 13.3*                                     | 15                                           | 5                                   |
| Hydroxychloroquine, %            | -                   | 6.7*                                      | 40                                           | 55                                  |
| Remdesivir, %                    | -                   | -                                         | 5                                            | 25                                  |
| Tocilizumab, %                   | -                   | -                                         | 5                                            | 30                                  |
| Chronic steroid use, %           | -                   | -                                         | 25                                           | 5                                   |
| Acute steroid use, %             | -                   | -                                         | 15                                           | 45                                  |
| Plasma IV nutrition, %           | -                   | -                                         | 0                                            | 0                                   |
| Enteral nutrition use, %         | -                   | -                                         | 100                                          | 100                                 |
| Antibiotic administration, %     | -                   | -                                         | 60                                           | 85                                  |
| Ethnicity                        |                     |                                           |                                              |                                     |
| African American, <i>n</i> (%)   | 0                   | 0                                         | 9 (45)                                       | 7 (35)                              |
| Hispanic or Latino, <i>n</i> (%) | 0                   | 2 (10)                                    | 6 (30)                                       | 9 (45)                              |
| Caucasian, <i>n</i> (%)          | 3 (15)              | 13 (65)                                   | 4 (20)                                       | 3 (15)                              |
| Other, <i>n</i> (%)              | 2 (10)              | 1 (5)                                     | 0                                            | 1 (5)                               |
| Unknown, <i>n</i> (%)            | 15 (75)             | 4 (20)                                    | 1 (5)                                        | 0                                   |

\*Based on 15 out of 20 donors with available data

**Supplementary Table 2.** Demographic characteristics of the validation cohort.

|                                  | <b>SARS-CoV-2 Negative</b> | <b>SARS-CoV-2 Positive<br/>Mild (outpatients)</b> | <b>SARS-CoV-2 Positive<br/>Moderate (Inpatients)</b> | <b>SARS-CoV-2 Positive<br/>Severe (ICU)</b> |
|----------------------------------|----------------------------|---------------------------------------------------|------------------------------------------------------|---------------------------------------------|
| Number ( <i>n</i> )              | -<br>18                    | -<br>20                                           | -<br>18                                              | -<br>19                                     |
| Female, <i>n</i> (%)             | 12 (67)                    | 9 (45)                                            | 6 (33)                                               | 5 (26)                                      |
| Age, years, median (IQR)         | 38.5 (19.25)               | 60 (10.5)                                         | 64.5 (14.5)                                          | 63 (15.5)                                   |
| Ethnicity                        | -                          | -                                                 | -                                                    | -                                           |
| African American, <i>n</i> (%)   | 0 (0)                      | 3 (15)                                            | 6 (33.3)                                             | 2 (10.5)                                    |
| Hispanic or Latino, <i>n</i> (%) | 1 (5.6)                    | 6 (30)                                            | 9 (50)                                               | 11 (57.9)                                   |
| Caucasian, <i>n</i> (%)          | 15 (83.3)                  | 5 (25)                                            | 3 (16.7)                                             | 5 (26.3)                                    |
| Other, <i>n</i> (%)              | 2 (11.1)                   | 3 (15)                                            | 0 (0)                                                | 1 (5.3)                                     |
| Unknown, <i>n</i> (%)            | 0 (0)                      | 3 (15)                                            | 0 (0)                                                | 0 (0)                                       |

**Supplementary Table 3.** The structures and names of *N*-glycans identified in plasma by capillary electrophoresis.

| Glycan name and structure                                                           | Group                  | Glycan name and structure                                                           | Group                       |
|-------------------------------------------------------------------------------------|------------------------|-------------------------------------------------------------------------------------|-----------------------------|
|    | S2 + ST + FB + LB      |    | G2 + GT + B + FC + LB       |
|    | G2 + GT + LB           |    | S2 + ST + B + FC + LB       |
|    | S1 + ST + LB           |    | G0 + FC + LB                |
|    | S1 + ST + G1 + GT + LB |    | G1 + GT + FC + LB           |
|    | S2 + ST + LB           |    | G1 + GT + FC + LB           |
|    | S3 + ST + FB + HB      |    | G2 + GT + FC + LB           |
|   | S2 + ST + G1 + GT + HB |   | S1 + ST + G1 + GT + FC + LB |
|  | S3 + ST + HB           |  | S1 + ST + G1 + GT + FC + LB |
|  | S3 + ST + G1 + GT + HB |  | S1 + ST + G1 + GT + FC + LB |
|  | S4 + ST + HB           |  | S2 + ST + FC + LB           |
|  | G0 + B + FC + LB       |  | S3 + ST + G1 + GT + FC + HB |
|  | G1 + GT + B + FC + LB  |  | LB                          |

-  Fucose
-  *N*-acetylglucosamine
-  Mannose
-  Galactose
-  *N*-acetylneuraminic acid

These 24 glycan structures can be grouped into 15 groups: bisecting GlcNAc (B group), sialic acid (non-sialylated (S0), mono-sialylated (S1), di-sialylated (S2), tri-sialylated and (S3), tetra-sialylated (S4), and total sialylated (ST)), galactose (agalactosylated (G0), mono-galactosylated (G1), di-galactosylated (G2), and total galactosylated (GT)), core fucose (FC group), branched fucose (FB group), high branched (HB group), and low branch (LB group).

**Supplementary Table 4.** The structures and names of *N*-glycans identified in isolated IgG by capillary electrophoresis.

| Glycan name and structure | Group           | Glycan name and structure | Group           |
|---------------------------|-----------------|---------------------------|-----------------|
| A2                        | S2 + ST         | G0FB                      | G0 + F + B      |
| A2F                       | S2 + ST + F     | G1F [6]                   | G1 + GT + F     |
| A2FB                      | S2 + ST + F + B | G1F [3]                   | G1 + GT + F     |
| A2B                       | S2 + ST + B     | G1FB                      | G1 + GT + F + B |
| G1FS1                     | S1 + ST + F     | G0                        | G0              |
| A1                        | S1 + ST         | G1S1                      | S1 + ST         |
| A1F                       | S1 + ST + F     | G2                        | G2 + GT         |
| A1FB                      | S1 + ST + F     | G2F                       | G2 + GT + F     |
| G0F                       | G0 + F          | G2FB                      | G2 + GT + F + B |
| G1                        | G1 + GT         | G1B [3]                   | G1 + GT + B     |
| G0B                       | G0 + B          | G1B [6]                   | G1 + GT + B     |

- Fucose
- N*-acetylglucosamine
- Mannose
- Galactose
- N*-acetylneuraminic acid

These 22 glycan structures were grouped into 9 groups, depending on the presence or absence of four key monosaccharides: bisecting GlcNAc (B group), sialic acid (mon-sialylated (S1), di-sialylated (S2), and total sialylated (ST)), terminal galactose (agalactosylated (G0), mono-galactosylated (G1), di-galactosylated (G2), and total galactose (GT)), and fucose (F group).

**Supplementary Table 5.** Lectins used for 45 lectin microarray.<sup>1</sup>

| Name       | Species                            | Origin      | Glycan specificity <sup>2</sup>                                                     |
|------------|------------------------------------|-------------|-------------------------------------------------------------------------------------|
| 1 LTL      | <i>Lotus tetragonolobus</i>        | Natural     | Fuc (Le <sup>x</sup> , Le <sup>y</sup> )                                            |
| 2 PSA      | <i>Pisum sativum</i>               | Natural     | α1-6Fuc up to biantenna                                                             |
| 3 LCA      | <i>Lens culinaris</i>              | Natural     | α1-6Fuc up to biantenna                                                             |
| 4 UEAI     | <i>Ulex europaeus</i>              | Natural     | α1-2Fuc                                                                             |
| 5 AOL      | <i>Aspergillus oryzae</i>          | Recombinant | α1-6Fuc (Core), α1-2Fuc (H), α1-3Fuc (Le <sup>x</sup> ), α1-3Fuc (Le <sup>a</sup> ) |
| 6 AAL      | <i>Aleuria aurantia</i>            | Natural     | α1-6Fuc (Core), α1-2Fuc (H), α1-3Fuc (Le <sup>x</sup> ), α1-3Fuc (Le <sup>a</sup> ) |
| 7 MAL      | <i>Maackia amurensis</i>           | Natural     | α2-3Sia                                                                             |
| 8 SNA      | <i>Sambucus nigra</i>              | Natural     | α2-6Sia                                                                             |
| 9 SSA      | <i>Sambucus sieboldiana</i>        | Natural     | α2-6Sia                                                                             |
| 10 TJAI    | <i>Trichosanthes japonica</i>      | Natural     | α2-6Sia                                                                             |
| 11 PHAL    | <i>Phaseolus vulgaris</i>          | Natural     | GlcNAcβ1-6Man (Tetraantenna)                                                        |
| 12 ECA     | <i>Erythrina cristagalli</i>       | Natural     | βGal                                                                                |
| 13 RCA120  | <i>Ricinus communis</i>            | Natural     | βGal                                                                                |
| 14 PHAE    | <i>Phaseolus vulgaris</i>          | Natural     | bisecting GlcNAc                                                                    |
| 15 DSA     | <i>Datura stramonium</i>           | Natural     | GlcNAcβ1-6Man (Tetraantenna)                                                        |
| 16 GSLII   | <i>Griffonia simplicifolia</i>     | Natural     | GlcNAcβ1-4Man                                                                       |
| 17 NPA     | <i>Narcissus pseudonarcissus</i>   | Natural     | Manα1-3Man                                                                          |
| 18 ConA    | <i>Canavalia ensiformis</i>        | Natural     | M3, Manα1-2Manα1-3(Manα1-6)Man, GlcNAcβ1-2Manα1-3(Manα1-6)Man                       |
| 19 GNA     | <i>Galanthus nivalis</i>           | Natural     | Manα1-3Man, Manα1-6Man                                                              |
| 20 HHL     | <i>Hippeastrum hybrid</i>          | Natural     | Manα1-3Man, Manα1-6Man                                                              |
| 21 ACG     | <i>Agroclype cylindracea</i>       | Natural     | α2-3Sia                                                                             |
| 22 TxLcl   | <i>Tulipa gesneriana</i>           | Natural     | Mannose/GalNAc                                                                      |
| 23 BPL     | <i>Bauhinia purpurea alba</i>      | Natural     | Galβ1-3GlcNAc(GalNAc), α/βGalNAc                                                    |
| 24 TJAI    | <i>Trichosanthes japonica</i>      | Natural     | α1-2Fuc                                                                             |
| 25 EEL     | <i>Euonymus europaeus</i>          | Natural     | αGal (B)                                                                            |
| 26 ABA     | <i>Agaricus bisporus</i>           | Natural     | Galβ1-3GalNAc (T), GlcNAc                                                           |
| 27 LEL     | <i>Lycopersicon esculentum</i>     | Natural     | Polylactosamine, (GlcNAc) <sub>n</sub>                                              |
| 28 STL     | <i>Solanum tuberosum</i>           | Natural     | Polylactosamine, (GlcNAc) <sub>n</sub>                                              |
| 29 UDA     | <i>Urtica dioica</i>               | Natural     | (GlcNAc) <sub>n</sub>                                                               |
| 30 PWM     | <i>Phytolacca americana</i>        | Natural     | (GlcNAc) <sub>n</sub>                                                               |
| 31 Jacalin | <i>Artocarpus integrifolia</i>     | Natural     | Galβ1-3GalNAc (T), GalNAcα (Tn)                                                     |
| 32 PNA     | <i>Arachis hypogaea</i>            | Natural     | Galβ1-3GalNAc (T)                                                                   |
| 33 WFA     | <i>Wisteria floribunda</i>         | Natural     | Terminal GalNAc, LacDiNAc                                                           |
| 34 ACA     | <i>Amaranthus caudatus</i>         | Natural     | Galβ1-3GalNAc (T)                                                                   |
| 35 MPA     | <i>Maclura pomifera</i>            | Natural     | Galβ1-3GalNAc (T), GalNAcα (Tn)                                                     |
| 36 HPA     | <i>Helix pomatia</i>               | Natural     | αGalNAc (A, Tn)                                                                     |
| 37 VVA     | <i>Vicia villosa</i>               | Natural     | α,βGalNAc (A, Tn, LacDiNAc)                                                         |
| 38 DBA     | <i>Dolichos biflorus</i>           | Natural     | α,βGalNAc (A, Tn, LacDiNAc)                                                         |
| 39 SBA     | <i>Glycine max</i>                 | Natural     | α,βGalNAc (A, Tn, LacDiNAc)                                                         |
| 40 Calsepa | <i>Calystegia sepium</i>           | Natural     | Biantenna with bisecting GlcNAc                                                     |
| 41 PTL I   | <i>Psophocarpus tetragonolobus</i> | Natural     | αGalNAc (A, Tn)                                                                     |
| 42 MAH     | <i>Maackia amurensis</i>           | Natural     | α2-3Sia                                                                             |
| 43 WGA     | <i>Triticum vulgare</i>            | Natural     | (GlcNAc) <sub>n</sub> , polySia                                                     |
| 44 GSLIA4  | <i>Griffonia simplicifolia</i>     | Natural     | αGalNAc (A, Tn)                                                                     |
| 45 GSLIB4  | <i>Griffonia simplicifolia</i>     | Natural     | αGal (B)                                                                            |

<sup>1</sup>Abbreviations: Gal (D-galactose), GalNAc (N-acetyl-galactosamine), GlcNAc (N-acetylglucosamine), Fuc (L-fucose), Glc (D-glucose), Sia (Sialic acid), LacNAc (N-acetyl-lactosamine).

<sup>2</sup>Specificity data was obtained by frontal affinity chromatography and glycoconjugate microarray.

**Supplementary Table 6.** A list of plasma markers measured in this study.

| Category                                        | Marker                                                                              | Name                                                                      | Method of Measurement                |
|-------------------------------------------------|-------------------------------------------------------------------------------------|---------------------------------------------------------------------------|--------------------------------------|
| <b>Microbial translocation markers</b>          | Zonulin                                                                             | haptoglobin 2 precursor                                                   | ELISA                                |
|                                                 | LBP                                                                                 | Lipopolysaccharide binding protein                                        | ELISA                                |
|                                                 | $\beta$ -D-glucan                                                                   | $\beta$ -D-glucan                                                         | Limulus Amebocyte Lysate (LAL) assay |
|                                                 | sCD14                                                                               | Soulble CD14                                                              | ELISA                                |
|                                                 | sCD163                                                                              | Soulble CD163                                                             | ELISA                                |
|                                                 | OCLN                                                                                | Occludin                                                                  | ELISA                                |
|                                                 | I-FABP                                                                              | Intestinal fatty-acid binding protein                                     | ELISA                                |
|                                                 | Reg3A                                                                               | Regenerating Family Member 3 Alpha                                        | ELISA                                |
| <b>Inflammation and immune function markers</b> | IL-6                                                                                | Interleukin 6                                                             | Multiplex meso scale cytokine assay  |
|                                                 | TNF- $\alpha$                                                                       | tumor necrosis factor alpha                                               | Multiplex meso scale cytokine assay  |
|                                                 | GM-CSF                                                                              | Granulocyte-macrophage colony-stimulating factor                          | Multiplex meso scale cytokine assay  |
|                                                 | IFN- $\alpha$ 2a                                                                    | interferon $\alpha$ 2a                                                    | Multiplex meso scale cytokine assay  |
|                                                 | IFN- $\beta$                                                                        | Interferon beta                                                           | Multiplex meso scale cytokine assay  |
|                                                 | IFN- $\gamma$                                                                       | Interferon gamma                                                          | Multiplex meso scale cytokine assay  |
|                                                 | IL-1 $\beta$                                                                        | Interleukin 1 $\beta$                                                     | Multiplex meso scale cytokine assay  |
|                                                 | IL-2                                                                                | Interleukin 2                                                             | Multiplex meso scale cytokine assay  |
|                                                 | IL-4                                                                                | Interleukin 4                                                             | Multiplex meso scale cytokine assay  |
|                                                 | IL-10                                                                               | Interleukin 10                                                            | Multiplex meso scale cytokine assay  |
|                                                 | IL-12p70                                                                            | Interleukin 12 p70                                                        | Multiplex meso scale cytokine assay  |
|                                                 | IL-12/IL-23p40                                                                      | Interleukin 12 p70                                                        | Multiplex meso scale cytokine assay  |
|                                                 | IL-13                                                                               | Interleukin 13                                                            | Multiplex meso scale cytokine assay  |
|                                                 | IL-15                                                                               | Interleukin-12/interleukin 23 p40                                         | Multiplex meso scale cytokine assay  |
|                                                 | IL-21                                                                               | Interleukin 21                                                            | Multiplex meso scale cytokine assay  |
|                                                 | IL-22                                                                               | Interleukin 22                                                            | Multiplex meso scale cytokine assay  |
|                                                 | IL-23                                                                               | Interleukin 23                                                            | Multiplex meso scale cytokine assay  |
|                                                 | IL-33                                                                               | Interleukin 33                                                            | Multiplex meso scale cytokine assay  |
|                                                 | Fractalkine                                                                         | chemokine (C-X3-C motif) ligand 1 (CX3CL1)                                | Multiplex meso scale cytokine assay  |
|                                                 | IP-10                                                                               | C-X-C motif chemokine ligand 10 (CXCL10)                                  | Multiplex meso scale cytokine assay  |
|                                                 | MCP-2                                                                               | Chemokine (C-C motif) ligand 8 (CCL8)                                     | Multiplex meso scale cytokine assay  |
|                                                 | MIP-1 $\alpha$                                                                      | Macrophage inflammatory protein alpha                                     | Multiplex meso scale cytokine assay  |
|                                                 | SDF-1a                                                                              | stromal cell-derived factor 1 (SDF1) or C-X-C motif chemokine 12 (CXCL12) | Multiplex meso scale cytokine assay  |
|                                                 | CRP                                                                                 | C-reactive protein                                                        | ELISA                                |
|                                                 | d-dimer                                                                             | D-dimer                                                                   | ELISA                                |
|                                                 | MPO                                                                                 | Neutrophil myeloperoxidase                                                | ELISA                                |
|                                                 | GDF-15                                                                              | Growth/differentiation factor 15                                          | ELISA                                |
|                                                 | C3a                                                                                 | Complement component 3a                                                   | ELISA                                |
|                                                 | Gal-1                                                                               | Galectin-1                                                                | ELISA                                |
|                                                 | Gal-3                                                                               | Galectin-3                                                                | ELISA                                |
| Gal-9                                           | Galectin-9                                                                          | ELISA                                                                     |                                      |
| <b>IgG N-glycome</b>                            | 22 individual glycans structures categorized into 9 groups (Supplementary Table 4)  |                                                                           | Capillary electrophoresis            |
| <b>IgA total glycome</b>                        | Binding to 45 lectins with known glycan-binding specificity (Supplementary Table 5) |                                                                           | Lectin microarray                    |
| <b>Plasma N-glycome</b>                         | 24 individual glycans structures categorized into 15 groups (Supplementary Table 3) |                                                                           | Capillary electrophoresis            |
| <b>Plasma total glycome</b>                     | Binding to 45 lectins with known glycan-binding specificity (Supplementary Table 5) |                                                                           | Lectin microarray                    |
| <b>Plasma Metabolome</b>                        | 278 plasma metabolites and three derivative ratios                                  |                                                                           | Mass spectrometry                    |
| <b>Plasma Lipidome</b>                          | 2015 plasma lipids categorized into 24 lipid classes                                |                                                                           | Mass spectrometry                    |

**Supplementary Table 7 . Top 50 metabolic pathways disrupted by severe COVID-19.**

| Pathway                                                      | P value    | FDR        | State     | Z      | Ratio  |
|--------------------------------------------------------------|------------|------------|-----------|--------|--------|
| tRNA Charging                                                | 7.9433E-27 | 2.5119E-24 | Activated | 2.828  | 0.22   |
| Superpathway of Citrulline Metabolism                        | 3.9811E-16 | 7.9433E-14 |           | 1.89   | 0.256  |
| Citrulline Biosynthesis                                      | 7.9433E-16 | 1E-13      |           | 1.134  | 0.333  |
| Arginine Biosynthesis IV                                     | 3.9811E-14 | 3.1623E-12 |           | 0      | 0.333  |
| Purine Nucleotides De Novo Biosynthesis II                   | 6.3096E-14 | 3.9811E-12 | Activated | 2.121  | 0.22   |
| Superpathway of Methionine Degradation                       | 1.2589E-11 | 6.9183E-10 |           | 0      | 0.127  |
| NAD biosynthesis II (from tryptophan)                        | 3.1623E-11 | 1.6982E-09 |           | 0.816  | 0.226  |
| Asparagine Biosynthesis I                                    | 5.0119E-11 | 2.3442E-09 |           | 0.447  | 0.625  |
| Proline Biosynthesis II (from Arginine)                      | 6.3096E-11 | 2.3988E-09 |           | 0      | 0.333  |
| Phenylalanine Degradation IV (Mammalian, via Side Chain)     | 6.3096E-11 | 2.3988E-09 |           | 0.378  | 0.206  |
| Purine Nucleotides Degradation II (Aerobic)                  | 7.9433E-11 | 2.7542E-09 |           |        | 0.2    |
| Urea Cycle                                                   | 1.3804E-10 | 3.9811E-09 |           |        | 0.3    |
| Glycolysis I                                                 | 3.3884E-10 | 9.1201E-09 |           |        | 0.167  |
| L-glutamine Biosynthesis II (tRNA-dependent)                 | 4.4668E-10 | 1.0965E-08 |           | 1      | 0.455  |
| Sirtuin Signaling Pathway                                    | 6.6069E-10 | 1.4454E-08 |           | 0.378  | 0.0401 |
| Lysine Degradation V                                         | 6.166E-10  | 1.4454E-08 |           | 0.447  | 0.24   |
| Gluconeogenesis I                                            | 7.7625E-10 | 1.5849E-08 |           |        | 0.149  |
| Alanine Degradation III                                      | 3.7154E-09 | 6.4565E-08 |           | 0      | 0.667  |
| Alanine Biosynthesis II                                      | 3.7154E-09 | 6.4565E-08 |           | 0      | 0.667  |
| Arginine Degradation VI (Arginase 2 Pathway)                 | 4.0738E-09 | 6.4565E-08 |           | 0      | 0.312  |
| 4-hydroxybenzoate Biosynthesis                               | 4.0738E-09 | 6.4565E-08 |           | 0.447  | 0.312  |
| NAD Biosynthesis from 2-amino-3-carboxymuconate Semialdehyde | 4.0738E-09 | 6.4565E-08 |           | 1      | 0.312  |
| Folate Polyglutamylation                                     | 7.9433E-09 | 1.1482E-07 |           | -0.447 | 0.278  |
| 5-aminoimidazole Ribonucleotide Biosynthesis I               | 7.9433E-09 | 1.1482E-07 |           | 1.342  | 0.278  |
| Glutamine Biosynthesis I                                     | 8.7096E-09 | 1.2023E-07 |           | -1     | 0.571  |
| Citrulline Degradation                                       | 1.7378E-08 | 2.2909E-07 |           | 0      | 0.5    |
| (S)-reticuline Biosynthesis II                               | 3.0903E-08 | 3.8019E-07 |           | 1      | 0.444  |
| Glycine Degradation (Creatine Biosynthesis)                  | 3.0903E-08 | 3.8019E-07 |           | 1      | 0.444  |
| γ-glutamyl Cycle                                             | 3.8905E-08 | 4.6774E-07 |           |        | 0.208  |
| 4-aminobutyrate Degradation I                                | 5.1286E-08 | 5.8884E-07 |           | 0      | 0.4    |
| Glutathione Biosynthesis                                     | 8.1283E-08 | 8.9125E-07 |           | 0      | 0.364  |
| Folate Transformations I                                     | 8.9125E-08 | 9.5499E-07 |           |        | 0.179  |
| Glutamate Degradation III (via 4-aminobutyrate)              | 1.2023E-07 | 1.2589E-06 |           |        | 0.333  |
| L-carnitine Biosynthesis                                     | 1.7378E-07 | 1.7378E-06 |           | -1     | 0.308  |
| Arginine Degradation I (Arginase Pathway)                    | 1.7378E-07 | 1.7378E-06 |           |        | 0.308  |
| PFKFB4 Signaling Pathway                                     | 1.9055E-07 | 1.8197E-06 | Activated | 2      | 0.0968 |
| Proline Biosynthesis I                                       | 2.4547E-07 | 2.2909E-06 |           | -1     | 0.286  |
| Cysteine Biosynthesis III (mammalia)                         | 3.8019E-07 | 3.4674E-06 |           |        | 0.135  |
| Salvage Pathways of Pyrimidine Ribonucleotides               | 4.3652E-07 | 3.7154E-06 |           | 0      | 0.0609 |
| Selenocysteine Biosynthesis II (Archaea and Eukaryotes)      | 4.3652E-07 | 3.7154E-06 |           | 1      | 0.25   |
| Citrulline-Nitric Oxide Cycle                                | 4.3652E-07 | 3.7154E-06 |           |        | 0.25   |
| Phosphatidylcholine Biosynthesis I                           | 5.7544E-07 | 4.5709E-06 |           | 1      | 0.235  |
| CMP-N-acetylneuraminat Biosynthesis I (Eukaryotes)           | 5.7544E-07 | 4.5709E-06 |           |        | 0.235  |
| Adenine and Adenosine Salvage VI                             | 6.3096E-07 | 4.8978E-06 |           |        | 0.6    |
| 4-hydroxyphenylpyruvate Biosynthesis                         | 6.3096E-07 | 4.8978E-06 |           |        | 0.6    |
| TCA Cycle II (Eukaryotic)                                    | 7.4131E-07 | 5.4954E-06 |           |        | 0.119  |
| Uridine-5'-phosphate Biosynthesis                            | 9.3325E-07 | 6.4565E-06 |           | 1      | 0.211  |
| Superpathway of Serine and Glycine Biosynthesis I            | 9.3325E-07 | 6.4565E-06 |           |        | 0.211  |
| Sucrose Degradation V (Mammalian)                            | 9.3325E-07 | 6.4565E-06 |           |        | 0.211  |

**Supplementary Table 8.** List of the gut-associated and gut microbiota-associated metabolites detected in our study using untargeted LC-MS/MS (50 of the 278 metabolites identified in plasma).

| <b>Name</b>                      | <b>Reference</b> |
|----------------------------------|------------------|
| $\alpha$ -Hydroxyhippuric acid   | (1)              |
| $\beta$ -D-Glucopyranuronic acid | (2)              |
| (2R)-2,3-Dihydroxypropanoic acid | (3)              |
| 16-Hydroxyhexadecanoic acid      | (4)              |
| 2-Hydroxycinnamic acid           | (5)              |
| 2-Hydroxyhippuric acid           | (1)              |
| 2-Hydroxyvaleric acid            | (6)              |
| 2,3-Dihydroxybenzoic acid        | (1)              |
| 2,4-Dihydroxybenzoic acid        | (7)              |
| 3-Hydroxybutyric acid            | (8)              |
| 3-Indoxyl sulphate               | (9)              |
| 3-methylphenylacetic acid        | (7)              |
| 4-Hydroxybenzaldehyde            | (7)              |
| 4-Hydroxyproline                 | (10)             |
| Acetylcholine                    | (11)             |
| Allantoin                        | (12)             |
| Cholic acid                      | (13)             |
| Choline                          | (14)             |
| Citrulline                       | (15)             |
| D-(-)-Mannitol                   | (16)             |
| D-Glucose                        | (17)             |
| Decanoic acid                    | (18)             |
| Deoxycholic Acid                 | (19)             |
| Glucose 6-phosphate              | (20)             |
| Glycine                          | (21)             |
| Glycocholic acid                 | (19)             |
| Glycoursodeoxycholic acid        | (19)             |
| Glycyl-L-leucine                 | (22)             |
| Hippuric acid                    | (1, 7)           |
| Indole-3-acetic acid             | (23)             |
| Indole-3-lactic acid             | (23)             |
| Indole-3-pyruvic acid            | (19)             |
| Kynurenic acid                   | (24)             |
| L-Isoleucine                     | (23)             |
| L-Kynurenine                     | (75)             |
| L-Lactic acid                    | (24, 25)         |
| L-Leucine                        | (24)             |
| L-Serine                         | (24, 25)         |
| L-Threonine                      | (25)             |
| L-Tryptophan                     | (23, 24)         |
| L-Valine                         | (24)             |
| N-Acetyl-DL-tryptophan           | (26)             |
| Pentadecanoic acid               | (18)             |
| Phosphoenolpyruvic acid          | (24)             |
| Pipecolic acid                   | (25)             |
| Pyruvic acid                     | (24)             |
| Succinic acid                    | (27)             |
| Taurochenodeoxycholic Acid       | (19)             |
| Trans-Cinnamic acid              | (28)             |
| Trimethylamine N-oxide           | (29)             |



**Supplementary Table 9.** Two thousand fifteen lipids identified in this study were assigned to 24 lipid classes.

| <b>Group</b>          | <b>Abbreviation</b> | <b>Class</b>                               | <b>Number of lipids</b> |
|-----------------------|---------------------|--------------------------------------------|-------------------------|
| <b>Phospholipids</b>  | CL                  | Cardiolipin                                | 2                       |
|                       | LPA                 | Lysophosphatidic acid                      | 2                       |
|                       | PA                  | Phosphatidic acid                          | 8                       |
|                       | LPC                 | Lysophosphatidylcholine                    | 110                     |
|                       | PC                  | Phosphatidylcholine                        | 262                     |
|                       | LPE                 | Lysophosphatidylethanolamine               | 22                      |
|                       | PE                  | Phosphatidylethanolamine                   | 139                     |
|                       | PG                  | Phosphatidylglycerol                       | 10                      |
|                       | LPI                 | Lysophosphatidylinositol                   | 6                       |
|                       | PI                  | Phosphatidylinositol                       | 47                      |
|                       | LPS                 | Lysophosphatidylserine                     | 1                       |
| PS                    | Phosphatidylserine  | 11                                         |                         |
| <b>Neutral lipids</b> | ChE                 | Cholesterol ester                          | 22                      |
|                       | DG/DAG              | Diglyceride                                | 58                      |
|                       | TG/TAG              | Triglyceride                               | 742                     |
| <b>Sphingolipids</b>  | Cer                 | Ceramide                                   | 121                     |
|                       | Hex1Cer             | Simple Glc series (Ceramide with 1 hexose) | 21                      |
|                       | Hex2Cer             | Simple Glc series (Ceramide with 2 hexose) | 10                      |
|                       | Hex3Cer             | Simple Glc series (Ceramide with 3 hexose) | 9                       |
|                       | LSM                 | Lysosphingomyelin                          | 1                       |
|                       | SM                  | Sphingomyelin                              | 359                     |
|                       | SPH                 | Sphingosine                                | 1                       |
| <b>Other lipids</b>   | AcCa                | Acyl carnitine                             | 46                      |
|                       | Co                  | Coenzyme                                   | 5                       |

**Supplementary Table 10.** Demographics, clinical data, and levels of selected measures in the moderate and severe groups of the main study cohort.

| ID | Group    | Age (years) | Sex    | Ethnicity        | Deceased | Body mass Index | Diabetes | High blood pressure | Asthma | Hydroxychloroquine | Remdesivir | Tocilizumab | Steroids | Antibiotics | IL-6 (pg/ml) | Zenoxon (ng/ml) | LBP (ng/ml) | fglucan (pg/ml) | eCD14 (ng/ml) | Ctntubulin (relative levels) | L-Mycurena/Typtophan |
|----|----------|-------------|--------|------------------|----------|-----------------|----------|---------------------|--------|--------------------|------------|-------------|----------|-------------|--------------|-----------------|-------------|-----------------|---------------|------------------------------|----------------------|
| 1  | Moderate | 57          | Female | African American | Yes      | >25             | No       | No                  | No     | Yes                | No         | No          | No       | Yes         | 1763.257047  | 163.8942        | 5004.6      | 17.83           | 3493.879433   | 1621735426                   | 0.316304883          |
| 2  | Moderate | 53          | Male   | Caucasian        | No       | >25             | No       | No                  | No     | Yes                | No         | No          | No       | No          | 18.01473445  | 49.6164         | 21917.376   | 29.72           | 3455.754172   | 713838364.6                  | 0.270994516          |
| 5  | Moderate | 58          | Female | African American | No       | >25             | No       | No                  | No     | No                 | No         | No          | Yes      | Yes         | 61.68376376  | 46.9002         | 16670.458   | 42.704          | 2370.889564   | 712152121.3                  | 0.048167588          |
| 6  | Moderate | 61          | Female | African American | No       | >25             | Pre      | Yes                 | No     | No                 | No         | No          | Yes      | No          | 6.349896414  | 36.7362         | 32509.685   | 32.786          | 2950.155591   | 781957761.3                  | 0.073713424          |
| 9  | Moderate | 61          | Female | African American | No       | >25             | Pre      | Yes                 | No     | Yes                | No         | No          | Yes      | No          | 14.72774326  | 25.4352         | 27308.872   | 49.836          | 3870.527475   | 1081500040                   | 0.100074352          |
| 10 | Moderate | 58          | Female | Hispanic         | No       | >25             | No       | No                  | No     | Yes                | No         | No          | No       | Yes         | 33.61113291  | 77.483          | 43753.549   | 73.084          | 3946.763302   | 650814955.9                  | 0.253576756          |
| 12 | Moderate | 62          | Male   | Caucasian        | No       | >25             | Pre      | No                  | No     | No                 | No         | No          | No       | Yes         | 2.154274243  | 47.1282         | 23866.672   | 64.42           | 1687.676587   | 86875446.6                   | 0.063867164          |
| 13 | Moderate | 56          | Male   | African American | No       | >25             | No       | No                  | No     | No                 | No         | No          | No       | No          | 10.22549033  | 12.7694         | 22474.136   | 55.522          | 3639.788518   | 694690536.8                  | 0.064552871          |
| 15 | Moderate | 62          | Male   | Caucasian        | No       | >25             | Yes      | Yes                 | No     | No                 | No         | No          | No       | No          | 3.10147469   | 0.5856          | 18370.92    | 51.33           | 2204.235012   | 23966448670                  | 0.088245657          |
| 16 | Moderate | 64          | Male   | African American | No       | >25             | No       | No                  | No     | Yes                | No         | No          | No       | No          | 8.36509405   | 68.8008         | 32301.397   | 62.97           | 1877.933692   | 113050743.2                  | 0.051193984          |
| 17 | Moderate | 57          | Female | Caucasian        | No       | >25             | No       | Yes                 | Yes    | No                 | No         | No          | Yes      | Yes         | 1.901578269  | 0.5856          | 18912.9     | 19.88           | 2027.228177   | 78220371.7                   | 0.05060764           |
| 26 | Moderate | 63          | Male   | Hispanic         | No       | >25             | Yes      | Yes                 | No     | No                 | No         | No          | Yes      | Yes         | 220.9539105  | 54.7636         | 39661.744   | 59.528          | 3385.222049   | 814348893.5                  | 0.081288883          |
| 27 | Moderate | 57          | Male   | Hispanic         | No       | >25             | Yes      | Yes                 | No     | No                 | No         | No          | Yes      | Yes         | 1.078627252  | 5.9794          | 7832.861    | 39.768          | 1855.827767   | 1262606509                   | 0.019510952          |
| 31 | Moderate | 59          | Female | African American | Yes      | >25             | Yes      | Yes                 | Yes    | Yes                | Yes        | Yes         | Yes      | Yes         | 109.2382182  | 123.3182        | 65613.144   | 80.456          | 4690.125491   | 806015750.1                  | 0.328378664          |
| 34 | Moderate | 58          | Male   | Hispanic         | No       | >25             | Pre      | Yes                 | No     | No                 | No         | No          | No       | Yes         | 4.747452725  | 65.789          | 18899.985   | 32.41           | 1954.250577   | 1621058972                   | 0.360265105          |
| 36 | Moderate | 59          | Female | Hispanic         | No       | >25             | No       | Yes                 | No     | No                 | No         | No          | No       | No          | 50.9140744   | 169.2356        | 39888.445   | 60.264          | 2521.605862   | 457648498.1                  | 0.144641071          |
| 37 | Moderate | 59          | Female | Hispanic         | No       | >25             | Yes      | Yes                 | No     | Yes                | No         | No          | Yes      | Yes         | 13.42164849  | 12.3572         | 41379.358   | 55.048          | 3079.004266   | 174336612.7                  | 0.06897164           |
| 38 | Moderate | 62          | Male   | African American | No       | >25             | No       | No                  | No     | No                 | No         | No          | No       | No          | 13.99319259  | 89.247          | 19775.875   | 62.86           | 2181.267201   | 550382449.4                  | 0.048178512          |
| 39 | Moderate | 64          | Female | African American | No       | >25             | No       | Yes                 | No     | No                 | No         | Yes         | Yes      | Yes         | 1.458963352  | 27.0292         | 15076.389   | 49.052          | 2102.888148   | 1005191769                   | 0.145485036          |
| 40 | Moderate | 51          | Female | Unknown          | No       | >25             | No       | No                  | No     | No                 | Yes        | No          | No       | No          | 1.646799114  | 30.3726         | 6096.586    | 35.732          | 1393.232256   | 579645991.7                  | 0.031223194          |
| 3  | Severe   | 59          | Male   | Hispanic         | No       | >25             | No       | No                  | No     | Yes                | No         | No          | Yes      | Yes         | 30.1633899   | 58.659          | 45712.063   | 82.202          | 2513.57029    | 441228129.5                  | 0.08464096           |
| 4  | Severe   | 57          | Female | African American | No       | >25             | Pre      | No                  | No     | Yes                | No         | Yes         | Yes      | Yes         | 619.0690777  | 34.6646         | 45438.47    | 52.812          | 3624.038942   | 574633636.5                  | 0.241071742          |
| 6  | Severe   | 63          | Male   | African American | No       | >25             | Yes      | Yes                 | No     | Yes                | No         | No          | No       | No          | 3.579886648  | 36.3104         | 25787.79    | 41.818          | 2430.854067   | 875668816.1                  | 0.097722934          |
| 7  | Severe   | 57          | Male   | African American | No       | >25             | Yes      | Yes                 | No     | Yes                | No         | Yes         | Yes      | Yes         | 616.9983792  | 100.6376        | 96150.038   | 101.848         | 4690.125491   | 96414095.3                   | 0.410510182          |
| 11 | Severe   | 63          | Female | African American | Yes      | >25             | Yes      | Yes                 | No     | No                 | Yes        | No          | Yes      | No          | 6.89334345   | 89.3092         | 19488.006   | 52.075          | 2315.330963   | 693800909.4                  | 0.058170326          |
| 14 | Severe   | 59          | Male   | Hispanic         | No       | >25             | Pre      | No                  | No     | Yes                | No         | No          | No       | Yes         | 10.27789698  | 32.433          | 30034.297   | 70.83           | 2679.447992   | 813006537.7                  | 0.068817304          |
| 18 | Severe   | 54          | Male   | African American | No       | >25             | Pre      | No                  | Yes    | No                 | Yes        | No          | No       | Yes         | 20.88384583  | 0.5655          | 25197.56    | 47.174          | 3306518939    | 561806052                    | 0.11084659           |
| 19 | Severe   | 52          | Male   | Hispanic         | Yes      | >25             | Yes      | Yes                 | No     | Yes                | No         | Yes         | Yes      | Yes         | 118.1545736  | 101.7684        | 44794.181   | 60.292          | 4396.923347   | 611287349.4                  | 0.17013349           |
| 20 | Severe   | 53          | Male   | Caucasian        | No       | >25             | Yes      | No                  | No     | Yes                | No         | Yes         | Yes      | Yes         | 24.14887075  | 185.911         | 50243.332   | 44.938          | 3663.26239    | 629935512.5                  | 0.148346286          |
| 21 | Severe   | 66          | Female | Hispanic         | No       | >25             | Yes      | Yes                 | No     | No                 | No         | No          | No       | No          | 24.1418214   | 47.1516         | 38449.275   | 70.882          | 2477.845897   | 39329768.8                   | 0.053024607          |
| 22 | Severe   | 52          | Male   | Other            | No       | >25             | No       | Yes                 | No     | No                 | No         | No          | Yes      | Yes         | 71.96666096  | 9.0916          | 41002.193   | 39.908          | 3346.3174     | 722847555                    | 0.081676354          |
| 23 | Severe   | 63          | Male   | African American | Yes      | >25             | No       | No                  | No     | No                 | No         | Yes         | Yes      | Yes         | 20.28186358  | 46.8406         | 54026.01    | 72.846          | 3758.345672   | 625376939.2                  | 0.108917984          |
| 24 | Severe   | 63          | Female | Hispanic         | Yes      | >25             | Pre      | Yes                 | No     | Yes                | No         | Yes         | Yes      | Yes         | 225.3700541  | 52.8488         | 63356.428   | 60.406          | 1852.145076   | 289965314.9                  | 0.265125673          |
| 25 | Severe   | 63          | Female | Caucasian        | Yes      | >25             | Yes      | Yes                 | Yes    | No                 | Yes        | No          | Yes      | Yes         | 265.4670538  | 177.1618        | 35176.888   | 79.79           | 4690.125491   | 577143302.6                  | 0.427586715          |
| 28 | Severe   | 59          | Female | Hispanic         | No       | >25             | Pre      | Yes                 | No     | Yes                | No         | No          | No       | Yes         | 125.2595669  | 29.183          | 56041.668   | 98.72           | 4395.229986   | 368228892.3                  | 0.205720859          |
| 29 | Severe   | 63          | Male   | Caucasian        | No       | >25             | Yes      | Yes                 | No     | No                 | No         | Yes         | No       | Yes         | 63.18794679  | 70.2674         | 31012.407   | 59.864          | 4690.125491   | 1012963079                   | 0.233697628          |
| 30 | Severe   | 64          | Male   | African American | Yes      | >25             | Yes      | Yes                 | No     | No                 | No         | No          | Yes      | Yes         | 11.06562902  | 36.173          | 16185.838   | 42.738          | 1515.144719   | 615842637.8                  | 0.032801245          |
| 32 | Severe   | 59          | Female | Hispanic         | No       | >25             | Pre      | Yes                 | No     | Yes                | Yes        | Yes         | No       | Yes         | 1.754959576  | 9.496           | 15714.848   | 47.298          | 1817.708263   | 1105465401                   | 0.065271545          |
| 33 | Severe   | 56          | Male   | Hispanic         | No       | >25             | Pre      | No                  | No     | No                 | No         | No          | No       | Yes         | 14.65192676  | 4.512           | 30376.545   | 45.368          | 2451.894146   | 663444317.6                  | 0.058172219          |
| 35 | Severe   | 51          | Male   | Hispanic         | No       | >25             | Pre      | No                  | No     | No                 | Yes        | No          | No       | Yes         | 132.1470257  | 67.0486         | 68888.297   | 65.182          | 2759.826511   | 292532699.6                  | 0.231106412          |

## References

1. Gonthier MP, Cheynier V, Donovan JL, Manach C, Morand C, Mila I, et al. 2003. Microbial aromatic acid metabolites formed in the gut account for a major fraction of the polyphenols excreted in urine of rats fed red wine polyphenols. *J Nutr* 133:461-7.
2. Pellock SJ, Redinbo MR. 2017. Glucuronides in the gut: Sugar-driven symbioses between microbe and host. *J Biol Chem* 292:8569-8576.
3. Monagas M, Urpi-Sarda M, Sanchez-Patan F, Llorach R, Garrido I, Gomez-Cordoves C, et al. 2010. Insights into the metabolism and microbial biotransformation of dietary flavan-3-ols and the bioactivity of their metabolites. *Food Funct* 1:233-53.
4. Zhitao H, Ailin S, Qingshuang W, Changyuan H, Liying S, Xianming S, et al. 2020. Research Square doi:10.21203/rs.3.rs-70833/v1.
5. Coman V, Vodnar DC. 2020. Hydroxycinnamic acids and human health: recent advances. *J Sci Food Agric* 100:483-499.
6. Skrzypecki J, Nieweglowska K, Samborowska E. 2020. Valeric Acid, a Gut Microbiota Product, Penetrates to the Eye and Lowers Intraocular Pressure in Rats. *Nutrients* 12.
7. Marhuenda-Munoz M, Laveriano-Santos EP, Tresserra-Rimbau A, Lamuela-Raventos RM, Martinez-Huelamo M, Vallverdu-Queralt A. 2019. Microbial Phenolic Metabolites: Which Molecules Actually Have an Effect on Human Health? *Nutrients* 11.
8. Selkrig J, Wong P, Zhang X, Pettersson S. 2014. Metabolic tinkering by the gut microbiome: Implications for brain development and function. *Gut Microbes* 5:369-80.
9. Farowski F, Els G, Tsakmaklis A, Higgins PG, Kahlert CR, Stein-Thoeringer CK, et al. 2019. Assessment of urinary 3-indoxyl sulfate as a marker for gut microbiota diversity and abundance of Clostridiales. *Gut Microbes* 10:133-141.
10. Huang YY, Martinez-Del Campo A, Balskus EP. 2018. Anaerobic 4-hydroxyproline utilization: Discovery of a new glycol radical enzyme in the human gut microbiome uncovers a widespread microbial metabolic activity. *Gut Microbes* 9:437-451.
11. Rea K, Dinan TG, Cryan JF. 2016. The microbiome: A key regulator of stress and neuroinflammation. *Neurobiol Stress* 4:23-33.
12. Pan L, Han P, Ma S, Peng R, Wang C, Kong W, et al. 2020. Abnormal metabolism of gut microbiota reveals the possible molecular mechanism of nephropathy induced by hyperuricemia. *Acta Pharm Sin B* 10:249-261.
13. Molinero N, Ruiz L, Sanchez B, Margolles A, Delgado S. 2019. Intestinal Bacteria Interplay With Bile and Cholesterol Metabolism: Implications on Host Physiology. *Front Physiol* 10:185.
14. Arias N, Arbolea S, Allison J, Kaliszewska A, Higarza SG, Gueimonde M, et al. 2020. The Relationship between Choline Bioavailability from Diet, Intestinal Microbiota Composition, and Its Modulation of Human Diseases. *Nutrients* 12.
15. Fragkos KC, Forbes A. 2018. Citrulline as a marker of intestinal function and absorption in clinical settings: A systematic review and meta-analysis. *United European Gastroenterol J* 6:181-191.
16. Maekawa M, Maekawa M, Ushida K, Hoshi S, Kashima N, Ajisaka K, et al. 2005. Butyrate and propionate production from D-mannitol in the large intestine of pig and rat. *Microbial Ecology in Health and Disease* 17:169-176.
17. Utschneider KM, Kratz M, Damman CJ, Hullar M. 2016. Mechanisms Linking the Gut Microbiome and Glucose Metabolism. *J Clin Endocrinol Metab* 101:1445-54.
18. Mathewson ND, Jenq R, Mathew AV, Koenigsnecht M, Hanash A, Toubai T, et al. 2016. Gut microbiome-derived metabolites modulate intestinal epithelial cell damage and mitigate graft-versus-host disease. *Nat Immunol* 17:505-513.
19. Ridlon JM, Kang DJ, Hylemon PB, Bajaj JS. 2014. Bile acids and the gut microbiome. *Curr Opin Gastroenterol* 30:332-8.
20. Di Rienzi SC, Britton RA. 2020. Adaptation of the Gut Microbiota to Modern Dietary Sugars and Sweeteners. *Adv Nutr* 11:616-629.

21. Craft IL, Geddes D, Hyde CW, Wise IJ, Matthews DM. 1968. Absorption and malabsorption of glycine and glycine peptides in man. *Gut* 9:425-37.
22. Yasumoto K, Sugiyama K. 1980. Perturbation by Bestatin of Glycyl-L-leucine Absorption in Isolated Epithelial Cells from Rat Intestine. *Agricultural and Biological Chemistry* 44:1339-1344.
23. Gao J, Xu K, Liu H, Liu G, Bai M, Peng C, et al. 2018. Impact of the Gut Microbiota on Intestinal Immunity Mediated by Tryptophan Metabolism. *Front Cell Infect Microbiol* 8:13.
24. Krautkramer KA, Fan J, Backhed F. 2020. Gut microbial metabolites as multi-kingdom intermediates. *Nat Rev Microbiol* doi:10.1038/s41579-020-0438-4.
25. Jain A, Li XH, Chen WN. 2019. An untargeted fecal and urine metabolomics analysis of the interplay between the gut microbiome, diet and human metabolism in Indian and Chinese adults. *Sci Rep* 9:9191.
26. Zhang L, Ouyang Y, Li H, Shen L, Ni Y, Fang Q, et al. 2019. Metabolic phenotypes and the gut microbiota in response to dietary resistant starch type 2 in normal-weight subjects: a randomized crossover trial. *Sci Rep* 9:4736.
27. Oliphant K, Allen-Vercoe E. 2019. Macronutrient metabolism by the human gut microbiome: major fermentation by-products and their impact on host health. *Microbiome* 7:91.
28. Kong J-Q. 2015. Phenylalanine ammonia-lyase, a key component used for phenylpropanoids production by metabolic engineering. *RSC Advances* 5:62587-62603.
29. Heianza Y, Ma W, DiDonato JA, Sun Q, Rimm EB, Hu FB, et al. 2020. Long-Term Changes in Gut Microbial Metabolite Trimethylamine N-Oxide and Coronary Heart Disease Risk. *J Am Coll Cardiol* 75:763-772.
